# Supplementary material for: Psychometric properties of the Mexican version of the opening minds stigma scale for health care providers (OMS-HC)
Source: PeerJ journal article supplement (doi:10.7717/peerj.16375), 2023-11-14
Supplement: S1.pdf [file S1.pdf]

El siguiente cuestionario busca conocer su opinión acerca de una serie de ideas sobre la salud mental. No hay respuestas correctas o incorrectas. Por favor, marque en cada casilla la respuesta que mejor se ajuste a su opinión.

|                                                                                                                                     | Completamente en desacuerdo | En desacuerdo            | Ni en acuerdo ni en desacuerdo | De acuerdo               | Completamente de acuerdo |
|-------------------------------------------------------------------------------------------------------------------------------------|-----------------------------|--------------------------|--------------------------------|--------------------------|--------------------------|
| 1. Me siento más cómodo ayudando a una persona que tiene una enfermedad física que a una persona que tiene una enfermedad mental.   | <input type="checkbox"/>    | <input type="checkbox"/> | <input type="checkbox"/>       | <input type="checkbox"/> | <input type="checkbox"/> |
| 2. Si supiera que un compañero está en tratamiento por una enfermedad mental, cómodo(a) trabajando con él.                          | <input type="checkbox"/>    | <input type="checkbox"/> | <input type="checkbox"/>       | <input type="checkbox"/> | <input type="checkbox"/> |
| 3. Si estuviera en tratamiento por una enfermedad mental, es poco probable que lo comente con alguno de mis compañeros.             | <input type="checkbox"/>    | <input type="checkbox"/> | <input type="checkbox"/>       | <input type="checkbox"/> | <input type="checkbox"/> |
| 4. Me sentiría incompetente si tuviera una enfermedad mental y no pudiera resolverlo por mí mismo.                                  | <input type="checkbox"/>    | <input type="checkbox"/> | <input type="checkbox"/>       | <input type="checkbox"/> | <input type="checkbox"/> |
| 5. Si tuviera una enfermedad mental seguramente no buscaría ayuda profesional.                                                      | <input type="checkbox"/>    | <input type="checkbox"/> | <input type="checkbox"/>       | <input type="checkbox"/> | <input type="checkbox"/> |
| 6. Los empleadores deberían contratar a alguien en tratamiento controlado por una enfermedad mental si es la mejor para el trabajo. | <input type="checkbox"/>    | <input type="checkbox"/> | <input type="checkbox"/>       | <input type="checkbox"/> | <input type="checkbox"/> |
| 7. Si supiera que el médico que me está tratando tiene una enfermedad mental seguiría yendo con él.                                 | <input type="checkbox"/>    | <input type="checkbox"/> | <input type="checkbox"/>       | <input type="checkbox"/> | <input type="checkbox"/> |
| 8. Les contaría a mis amigos si tuviera una enfermedad mental.                                                                      | <input type="checkbox"/>    | <input type="checkbox"/> | <input type="checkbox"/>       | <input type="checkbox"/> | <input type="checkbox"/> |
| 9. Me inquieta estar cerca de personas con enfermedad mental.                                                                       | <input type="checkbox"/>    | <input type="checkbox"/> | <input type="checkbox"/>       | <input type="checkbox"/> | <input type="checkbox"/> |
| 10. Es poco lo que se puede hacer para ayudar a las personas con enfermedades mentales.                                             | <input type="checkbox"/>    | <input type="checkbox"/> | <input type="checkbox"/>       | <input type="checkbox"/> | <input type="checkbox"/> |
| 11. La mayoría de las personas con enfermedad mental no se esmeran por mejorar.                                                     | <input type="checkbox"/>    | <input type="checkbox"/> | <input type="checkbox"/>       | <input type="checkbox"/> | <input type="checkbox"/> |
| 12. Preferiría que una persona con una enfermedad mental no trabajara con niños, aunque estuviera en un adecuado tratamiento.       | <input type="checkbox"/>    | <input type="checkbox"/> | <input type="checkbox"/>       | <input type="checkbox"/> | <input type="checkbox"/> |
| 13. Los profesionales de la salud no tienen por qué ser defensores de las personas con enfermedades mentales.                       | <input type="checkbox"/>    | <input type="checkbox"/> | <input type="checkbox"/>       | <input type="checkbox"/> | <input type="checkbox"/> |
| 14. No me molestaría que una persona con una enfermedad mental fuera mi vecino.                                                     | <input type="checkbox"/>    | <input type="checkbox"/> | <input type="checkbox"/>       | <input type="checkbox"/> | <input type="checkbox"/> |
| 15. Me es complicado sentir compasión por una persona con una enfermedad mental.                                                    | <input type="checkbox"/>    | <input type="checkbox"/> | <input type="checkbox"/>       | <input type="checkbox"/> | <input type="checkbox"/> |

Modgill G, Patten SB, Knaak S, Kassam A, Szeto AC. Opening minds stigma scale for healthcare providers (OMS-HC): Examination of psychometric properties and responsiveness. *BMC Psychiatry* 2014; 14(1):120. <http://www.biomedcentral.com/1471-244X/14/120>.

Kassam A, Papish A, Modgill G, Patten S. The development and psychometric properties of a new scale to measure mental illness related stigma by health care providers: The opening minds scale for Health Care Providers (OMS-HC). *BMC Psychiatry* 2012; 12:62. DOI: 10.1186/1471-244X-12-62.
