# Supplementary material for: Psychometric properties of the Mexican version of the opening minds stigma scale for health care providers (OMS-HC)
Source: PeerJ journal article supplement (doi:10.7717/peerj.16375), 2023-11-14
Supplement: S2_Dataset_Information.pdf [file S2_Dataset_Information.pdf]

## Dataset Information

| Dimension        | Questionnaire       | Variable (Label)        | Response Format                                                                                                                                                    | Information                                                                                                                                           |
|------------------|---------------------|-------------------------|--------------------------------------------------------------------------------------------------------------------------------------------------------------------|-------------------------------------------------------------------------------------------------------------------------------------------------------|
| Sociodemographic | General Information | Age (Age)               | Numeric                                                                                                                                                            | Years of life completed.                                                                                                                              |
|                  |                     | Gender (Gen)            | 1 Female<br>2 Male                                                                                                                                                 | Sex/gender identity.                                                                                                                                  |
|                  |                     | Discipline (Disc)       | 1 Medicine<br>2 Nursing<br>3 Clinical psychology<br>4 Others                                                                                                       | Academic field of study. "Others" include social work, occupational therapy, and physiotherapy.                                                       |
|                  |                     | Occupation (Ocup)       | Categorical<br>1 Student<br>2 Professional<br>3 Both                                                                                                               | Occupation refers to the state or activity in which a person is involved. Some individuals concurrently hold the roles of students and professionals. |
|                  |                     | Educational Level (Edu) | 1 Technical education<br>2 Bachelor's degree<br>3 Master's degree<br>4 Doctoral degree                                                                             | Level of education achieved. In this case, it encompasses a range from technical education to postgraduate programs.                                  |
|                  |                     | Academic semester (Acs) | 1 1°-4° semester<br>2 5°-6° semester<br>3 7°-8° semester<br>4 9°-10° semester<br>5 Social service<br>6 Specialization<br>7 Graduate program<br>8 Only professional | Refers to the specific period within the academic year during which students are currently enrolled and attending classes.                            |

|                      |                                     |       |                              |                                                                     |
|----------------------|-------------------------------------|-------|------------------------------|---------------------------------------------------------------------|
| Mental health stigma | Opening Minds Stigma Scale (OMS-HC) | oms1  | Likert 5 Completely disagree | Attitudes of healthcare providers toward people with mental illness |
|                      |                                     | oms9  | Disagree                     |                                                                     |
|                      |                                     | oms10 | Neither agree nor disagree   |                                                                     |
|                      |                                     | oms11 | Agree                        |                                                                     |
|                      |                                     | oms13 | Completely agree             | Disclosure/help-seeking                                             |
|                      |                                     | oms15 |                              |                                                                     |
|                      |                                     | oms3  |                              |                                                                     |
|                      |                                     | oms4  |                              |                                                                     |
|                      |                                     | oms5  |                              | Social Distance                                                     |
|                      |                                     | oms8  |                              |                                                                     |
|                      |                                     | oms2  |                              |                                                                     |
|                      |                                     | oms6  |                              |                                                                     |
|                      |                                     | oms7  |                              |                                                                     |
|                      |                                     | oms12 |                              |                                                                     |
|                      |                                     | oms14 |                              |                                                                     |
